# Supplementary material
Source: PubMed Central journal article supplement (PMC7055702)
Supplement: rcmb.2019-0071OC_rana_data_supplement.pdf [file rcmb.2019-0071OC_rana_data_supplement.pdf]

## Online Supplementary Data

**sTable 1.** Primers for quantitative real-time PCR

| <b>Gene (mouse)</b> | <b>TaqMan Primer ID</b> |  | <b>Gene (rat)</b> | <b>TaqMan Primer ID</b> |
|---------------------|-------------------------|--|-------------------|-------------------------|
| Arginase1           | Mm00475988_m1           |  | Arginase1         | Rn00691090_m1           |
| iNOS                | Mm01309902_m1           |  | iNOS              | Rn00561646_m1           |
| TNF- $\alpha$       | Mm00443258_m1           |  | TNF- $\alpha$     | Rn99999017_m1           |
| IL-4                | Mm00445259_m1           |  | TGF- $\beta$ 1    | Rn00572010_m1           |
| Fizz1               | Mm00445109_m1           |  | Fizz1/Retnla      | Rn04219584_g1           |
| Ym1                 | Mm00657889_mH           |  | Ym1/chil3         | Rn01523660_g1           |
| TGF- $\beta$ 1      | Mm01178820_m1           |  | Stat1             | Rn00583505_m1           |
| IL-6                | Mm00446190_m1           |  | Stat6             | Rn01505881_m1           |
| IL-13               | Mm00434204_m1           |  | $\beta$ -actin    | Rn00667869_m1           |
| Stat1               | Mm01257286_m1           |  |                   |                         |
| Stat6               | Mm01160477_m1           |  |                   |                         |
| GAPDH               | Mm03302249_g1           |  |                   |                         |

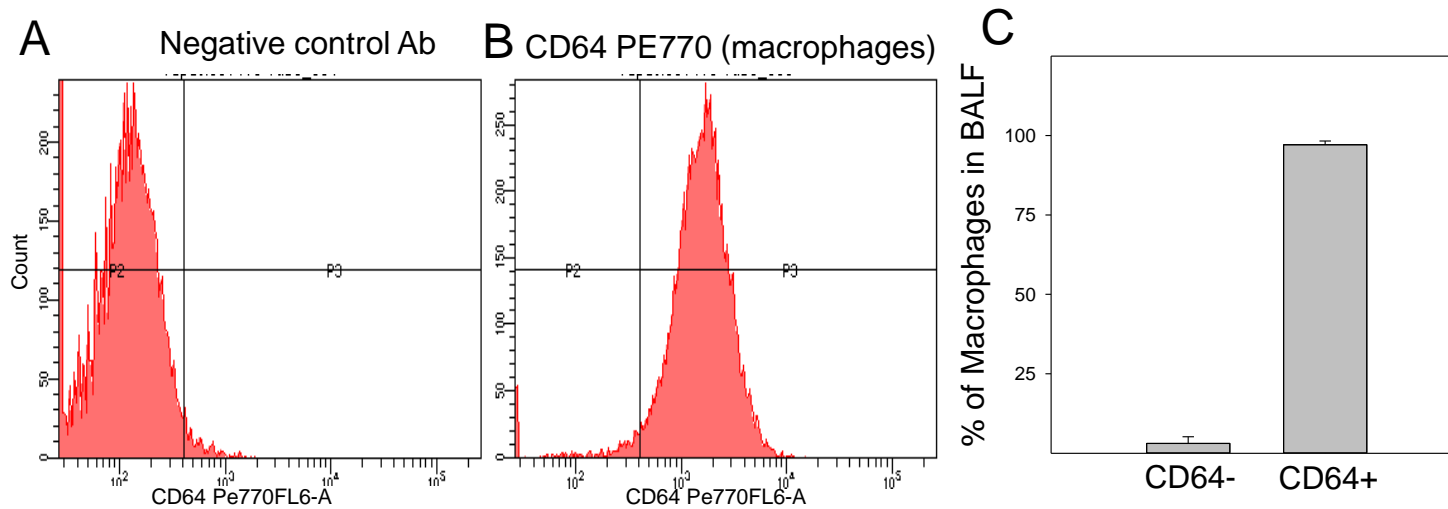

**sFig 1. Flow cytometry analysis of isolated alveolar macrophages.** Mouse alveolar macrophages isolated by bronchoalveolar lavage were immuno-stained with anti CD64 antibody (macrophage marker) or a negative isotope control antibody and analyzed by flow cytometry as described in the method section. The results were expressed as percentage of total cells (n=3).

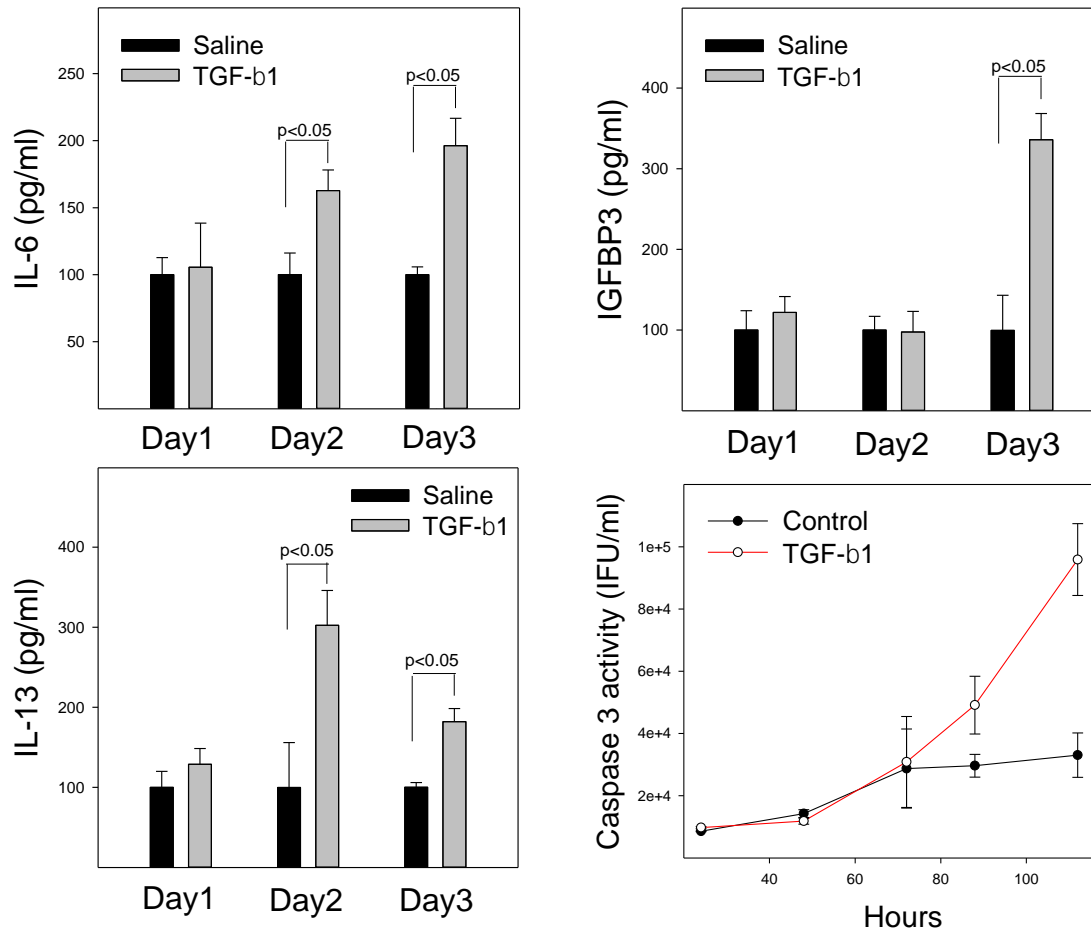

**sFig 2. Time-dependent changes in the secretion of senescent and pro-fibrotic mediators as well as caspase 3/7 activity TGF-β1 treated ATII cells.** Mouse ATII cells were treated with 2 ng/ml TGF-β1 in the serum-free medium and the conditional medium was collected at times indicated. The amounts of IL-6, IGFBP3, and IL-13 proteins as well as caspase3/7 activity in the medium were assessed by ELISA and a kit from Promega (n=3-6).
